# Supplementary material for: Engineering of Recombinant Poplar Deoxy-D-Xylulose-5-Phosphate Synthase (PtDXS) by Site-Directed Mutagenesis Improves Its Activity
Source: PubMed Central journal article supplement (PMC4993486; doi:10.1371/journal.pone.0161534), 2016-08-22
Supplement: pone.0161534.s002.pdf [file pone.0161534.s002.pdf]

# Engineering of Recombinant Poplar Deoxy-D-xylulose-5-phosphate Synthase (*Pt*DXS) by Site-directed Mutagenesis Improves Its Activity

Aparajita Banerjee<sup>1</sup>, Thomas D. Sharkey<sup>1\*</sup>

<sup>1</sup>Department of Biochemistry and Molecular Biology, Michigan State University, East Lansing, MI, USA

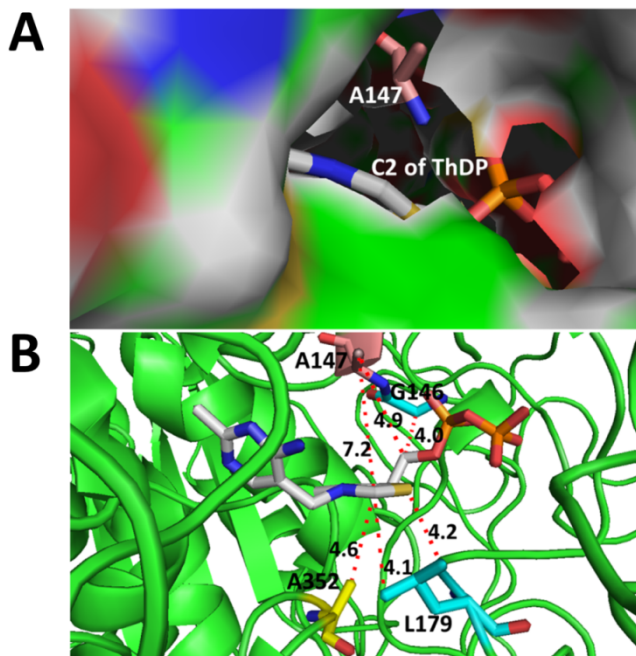

**Fig S2. A. Zoomed in surface view of the orientation of Ala-147 residue of WTP*t*DXS and the thiazolium ring of ThDP in the enzyme active site. B. Cartoon view of the interactions of different residues of WTP*t*DXS with ThDP and their relevant distances from the thiazolium ring and the carbon chain of ThDP.**
